# Supplementary material for: Identification and characterization of novel cellulolytic and hemicellulolytic genes and enzymes derived from German grassland soil metagenomes
Source: PubMed Central journal article supplement — Biotechnol Lett. 2011 Dec 21;34(4):663–75. doi: 10.1007/s10529-011-0830-2 (PMC3298741; doi:10.1007/s10529-011-0830-2), 2011-12-21
Supplement: 10529_2011_830_MOESM1_ESM.pdf [file 10529_2011_830_MOESM1_ESM.pdf]

# Identification and characterization of novel cellulolytic and hemicellulolytic genes and enzymes derived from German grassland soil metagenomes

Heiko Nacke *et al.*

## Supplementary materials (Tables and Figures)

### Contents

**Fig. S1.** Effects of temperature and pH on activity of Xyn01 and Xyn02.

**Fig. S2.** Thermal stability of Cel01

**Table S1.** DNA yields and characteristics of the analyzed grassland soil samples.

**Table S2.** Open reading frames identified on pLC01, pLX01, and pLX02 and description of corresponding gene products and their observed sequence similarities.

**Table S3.** Properties of Cel01 and other soil metagenome-derived cellulases.

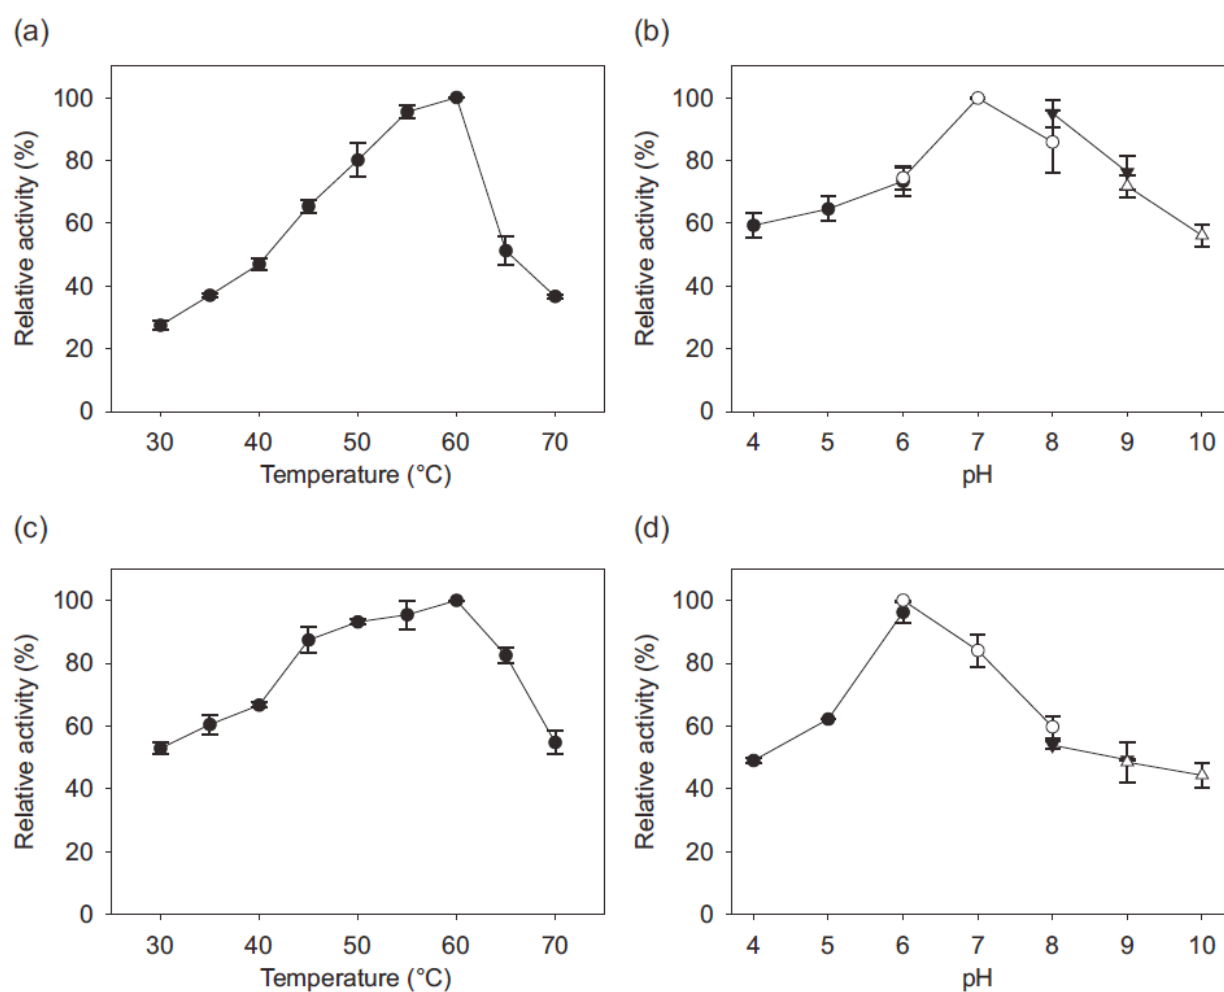

**Fig. S1.** Effects of temperature and pH on activity of Xyn01 and Xyn02. The effects were measured by using crude cell-free extracts prepared from *E. coli* TOP10 carrying pLX01 (Xyn01) or pLX02 (Xyn02). Activity was determined using the standard assay with xylan from birch wood as a substrate at temperatures between 30 and 70°C. The dependence of activity on pH was measured at pH values between 4 and 10 using sodium acetate buffer (black circles), sodium phosphate buffer (white circles), Tris-HCl buffer (black triangles), and glycine-NaOH buffer (white triangles). (a) Effect of temperature on activity of Xyn01, (b) effect of pH on the activity of Xyn01, (c) effect of temperature on activity of Xyn02, and (d) effect of pH on the activity of Xyn02. The average of triplicate experiments is presented.

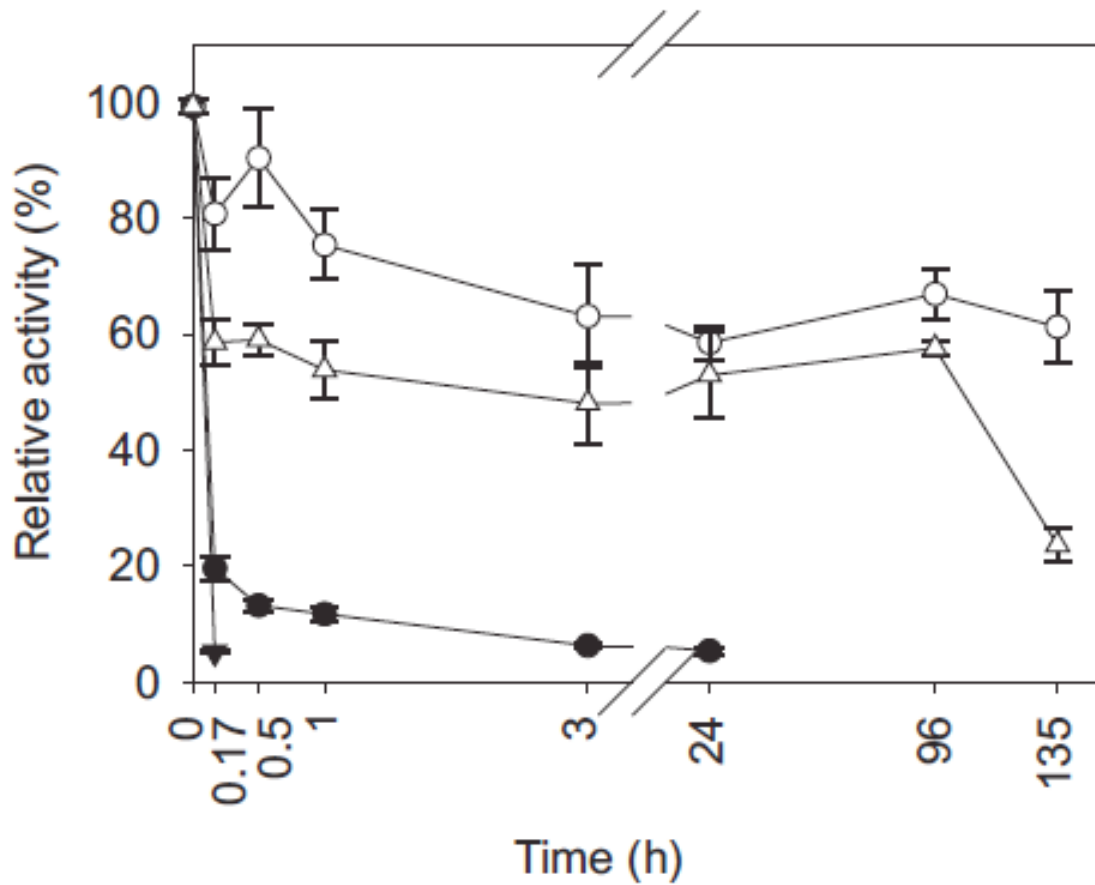

**Fig. S2.** Thermal stability of Cel01. The thermal stability of Cel01 was investigated after incubation of the enzyme at different temperatures (30°C, white circles; 40°C, white triangles; 50°C, black circles; 60°C, black triangles), and then measuring the residual activity with the standard assay. The average of triplicate experiments is presented.

**Table S1.** DNA yields and characteristics of the analyzed grassland soil samples.

| Sample | DNA yield<br>( $\mu\text{g/g}$ soil) | Soil group | pH  | OC <sup>a</sup><br>( $\text{g kg}^{-1}$ ) | Total N<br>( $\text{g kg}^{-1}$ ) | C:N<br>ratio | Gravimetric<br>water content<br>(%) |
|--------|--------------------------------------|------------|-----|-------------------------------------------|-----------------------------------|--------------|-------------------------------------|
| SEG9   | 53.6                                 | Histosol   | 6.2 | 229.7                                     | 18.7                              | 12.3         | 114.8                               |
| AEG3   | 25.3                                 | Leptosol   | 6.3 | 53.7                                      | 5.2                               | 10.4         | 57.2                                |
| AEG6   | 56.7                                 | Leptosol   | 6.1 | 68.2                                      | 6.7                               | 10.2         | 64.0                                |

<sup>a</sup>, Organic carbon content

**Table S2.** Open reading frames identified on pLC01, pLX01, and pLX02 and description of corresponding gene products and their observed sequence similarities.

| Plasmid<br>(accession no.) | ORF<br>(Position)           | No. of encoded<br>amino acids | Closest similar protein, accession no. (no. of encoded amino acids), organism                   | E value | Amino acid homology to closest<br>similar protein (% identity) |
|----------------------------|-----------------------------|-------------------------------|-------------------------------------------------------------------------------------------------|---------|----------------------------------------------------------------|
| pLC01 (JF799947)           | <i>cel01</i><br>(3138-643)  | 831                           | Cellulase, YP_001612873 (772), <i>Sorangium cellulosum</i> 'So ce 56'                           | 7e-150  | 288/581 (50)                                                   |
| pLX01 (JF799945)           | <i>xyn01</i><br>(2839-2327) | 170                           | Xylanase, ABL11222 (226), uncultured bacterium                                                  | 2e-71   | 132/171 (78)                                                   |
|                            | <i>orf01</i><br>(3226-4524) | 432                           | Transcriptional regulator of DeoR family, YP_004119403 (322),<br><i>Pantoea</i> sp. At-9b       | 0.001   | 62/249 (25)                                                    |
| pLX02 (JF799946)           | <i>xyn02</i><br>(757-1524)  | 255                           | Xylanase, ABL11222 (226), uncultured bacterium                                                  | 1e-69   | 140/203 (69)                                                   |
|                            | <i>orf01</i><br>(1762-2961) | 398                           | Ser/Thr protein phosphatase family protein, ZP_05031548 (321),<br><i>Brevundimonas</i> sp. BAL3 | 2e-29   | 88/277 (32)                                                    |

**Table S3.** Properties of Cel01 and other soil metagenome-derived cellulases.

| Cellulase | Source                     | No. of amino acids | GH family | CBM | Substrate profile                  | Temperature optimum (°C) | pH optimum | pH range <sup>a</sup> | Reference         |
|-----------|----------------------------|--------------------|-----------|-----|------------------------------------|--------------------------|------------|-----------------------|-------------------|
| Cel01     | German grassland soil      | 831                | 9         | +   | $\beta$ -1,4-linked glucans        | 50                       | 7.0        | 5.0-9.0               | This study        |
| Umcel9B   | Aerated compost soil       | 579                | 9         | -   | $\beta$ -linked glucose            | 25                       | 7.0        | 6.5-8.5               | Pang et al. 2009  |
| CelM2     | Korean soil                | 662                | 44        | -   | $\beta$ -linked glucose and xylose | 45                       | 4.0        | 3.5-5.5               | Kim et al. 2008   |
| Cel5G     | South Chinese red soil     | 443                | 5         | -   | $\beta$ -linked glucose and xylose | 50                       | 4.8        | 4.0-6.6               | Liu et al. 2011   |
| Cel5A     | Enrichment culture of soil | 363                | 5         | -   | $\beta$ -1,4-linked glucans        | 45                       | 6.5        | 5.5-9.0               | Voget et al. 2006 |

<sup>a</sup>, relative activity  $\geq 40\%$ ; +, detected; -, not detected; ND, not determined; GH, glycoside hydrolase; CBM, carbohydrate-binding module.

### References

- Kim SJ, Lee CM, Han BR, Kim MY, Yeo YS, Yoon SH, Koo BS, Jun HK (2008) Characterization of a gene encoding cellulase from uncultured soil bacteria. *FEMS Microbiol Lett* 282:44-51
- Liu J, Liu WD, Zhao XL, Shen WJ, Cao H, Cui ZL (2011) Cloning and functional characterization of a novel endo- $\beta$ -1,4-glucanase gene from a soil-derived metagenomic library. *Appl Microbiol Biotechnol* 89:1083-1092
- Pang H, Zhang P, Duan CJ, Mo XC, Tang JL, Feng JX (2009) Identification of cellulase genes from the metagenomes of compost soils and functional characterization of one novel endoglucanase. *Curr Microbiol* 58:404-408
- Voget S, Steele HL, Streit WR (2006) Characterization of a metagenome-derived halotolerant cellulase. *J Biotechnol* 126:26-36
